# Supplementary material for: Quantitative Analysis of Psoralea corylifolia Linne and its Neuroprotective and Anti-Neuroinflammatory Effects in HT22 Hippocampal Cells and BV-2 Microglia
Source: MDPI journal article supplement (doi:10.3390/molecules21081076), 2016-08-17
Supplement: s1 [file s1]

# Supplementary Materials: Quantitative Analysis of *Psoralea corylifolia* Linne and Its Neuroprotective and Anti-Neuroinflammatory Effects in HT22 Hippocampal Cells and BV-2 Microglia

Yu Jin Kim, Hye-Sun Lim, Jun Lee and Soo-Jin Jeong

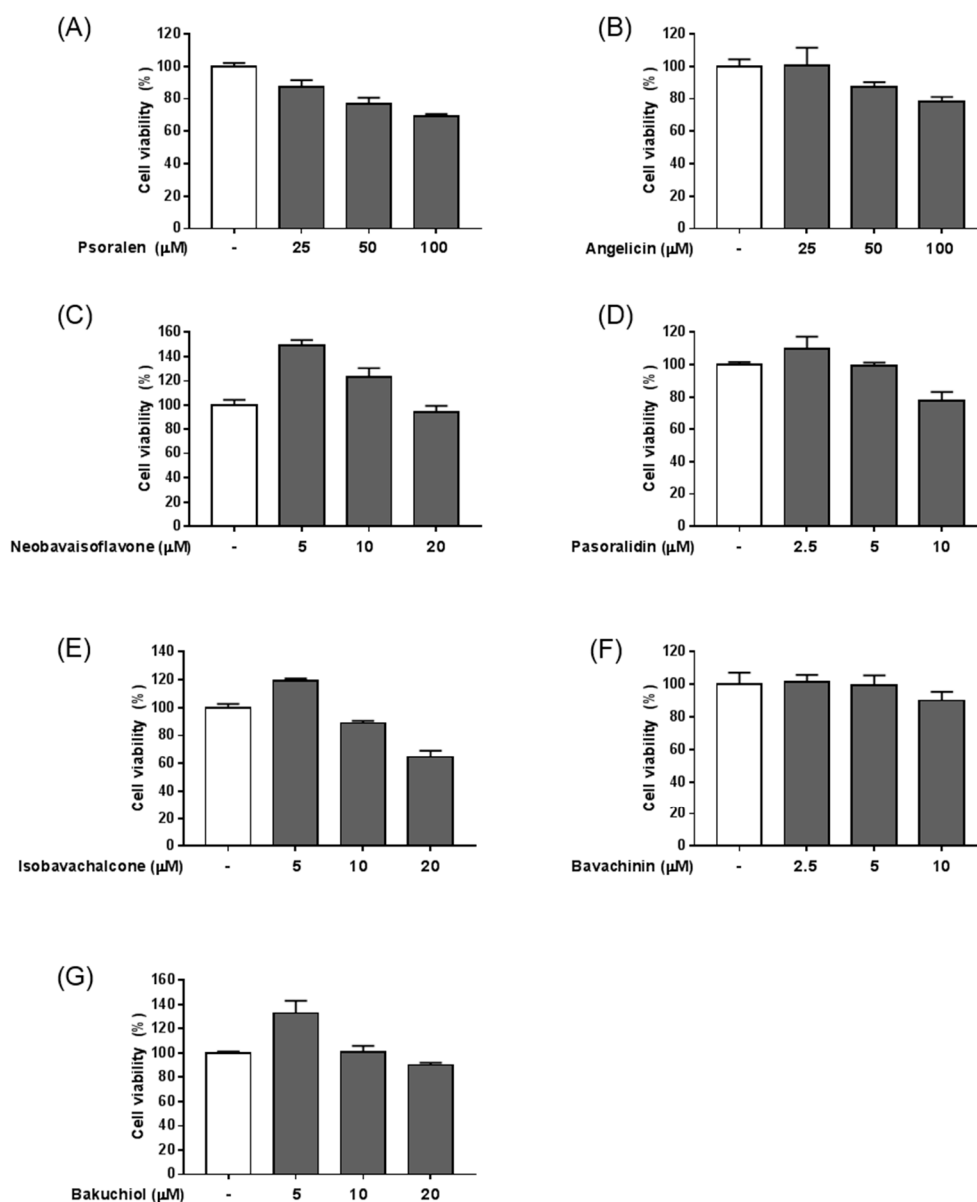

**Figure S1.** Cytotoxicity of the seven components from *P. corylifolia* in HT22 cells. Cells were seeded onto 96-well plates and treated with various concentrations of the seven components for 6 h. Results are shown for psoralen (A); angelicin (B); neobavaisoflavone (C); psoralidin (D); isobavachalcone (E); bavachinin (F); and bakuchiol (G). Cell viability (%) was assessed using CCK-8 assay. The values are expressed as the mean  $\pm$  SEM of three independent experiments.
